# Supplementary material for: Decontamination of Spores on Model Stainless-Steel Surface by Using Foams Based on Alkyl Polyglucosides
Source: MDPI journal article supplement (doi:10.3390/molecules28030936), 2023-01-17
Supplement: s1 [file s1]

# Supporting Information

## Decontamination of spores on model stainless steel surface by using foams based on alkyl polyglucosides

Carolina Dari <sup>1</sup>, Heni Dallagi <sup>1</sup>, Christine Faille <sup>1</sup>, Thomas Dubois <sup>1</sup>, Christelle Lemy <sup>1</sup>, Maureen Deleplace <sup>1</sup>, Marwan Abdallah <sup>1</sup>, Cosmin Gruescu <sup>1</sup>, Julie Beaucé <sup>1</sup>, Thierry Benezech <sup>1</sup> and Anne-Laure Fameau <sup>1,\*</sup>

<sup>1</sup> Univ. Lille, CNRS, INRAE, Centrale Lille, UMET, F-59000 Lille, France;

\* Correspondence: anne-laure.fameau@inrae.fr

Table S1: Contribution of the foam cleaning process with APG and the foam cleaning process with SDS to the environmental impact categories selected according to the ReCiPe midpoint (H) impact assessment method.

| Impact category             | Unit                  | Foam Cleaning process with APG | Foam Cleaning process with SDS |
|-----------------------------|-----------------------|--------------------------------|--------------------------------|
| Natural land transformation | m <sup>2</sup>        | 1,30E-03                       | 1,53E-03                       |
| Terrestrial ecotoxicity     | Kg,1,4-DB eq          | 1,46E-03                       | 1,62E-03                       |
| Climate change              | kg CO <sub>2</sub> eq | 2,58E+00                       | 2,72E+14                       |
| Marine ecotoxicity          | kg 1,4-DB eq          | 1,31E-02                       | 1,48E-02                       |
| Human toxicity              | kg 1,4-DB eq          | 5,59E-01                       | 6,23E-01                       |
| Fossil depletion            | kg oil eq             | 8,59E-01                       | 9,31E-01                       |
| Water depletion             | m <sup>3</sup>        | 2,24E+01                       | 2,27E+01                       |
| Marine eutrophication       | kg N eq               | 7,25E-04                       | 6,79E-04                       |
